# Supplementary material for: Naive T cells inhibit the outgrowth of intractable antigen-activated memory T cells: implications for T-cell immunotherapy
Source: HighWire-hosted journal article supplement (doi:10.1136/jitc-2022-006267), 2023-04-01
Supplement: jitc-2022-006267supp008_data_supplement.pdf [file jitc-2022-006267supp008_data_supplement.pdf]

## 1 **SUPPLEMENTAL MATERIALS AND METHODS:**

### 2 **Cell lines**

3 EBV transformed B lymphoblastoid cell lines (EBV-LCLs) were generated by infecting PBMCs  
4 with the B95-8 strain of EBV in the presence of cyclosporin A (Sandoz, Germany). EBV-LCLs  
5 were cultured in RPMI 1640 (HyClone Laboratories Inc.), 2mM GlutaMAX TM-I, and 10%  
6 Fetal Bovine Serum (R-10 medium). The ULCL was generated by knocking out surface  
7 expression of HLA class I and II molecules. K562cs was derived from the HLA-negative,  
8 chronic erythroid leukemia cell line, K562 that lacks HLA class I and II molecules, by genetic  
9 modification with CD80, CD83, CD86, 4-1BB-L and was a gift from Dr. Carl June (University  
10 of Pennsylvania, Perelman School of Medicine). K562cs were cultured in R-10 medium and  
11 provided costimulation for VST expansion. In some experiments, an MHC class I and class II  
12 negative EBV-LCL (ULCL) was used for costimulation instead of K562cs.

13

### 14 **Cell culture media**

15 T-cells were cultured in VST medium [RPMI 1640 (HyClone Laboratories Inc. Logan, Utah),  
16 45% Click's (Irvine Scientific, Santa Ana, CA), 2mM GlutaMAX TM-I (Gibco by Life  
17 Technologies, Grand Island, NY), and 10% Fetal Bovine Serum (HyClone Laboratories Inc.)].

18

### 19 **Pepmixes**

20 Overlapping peptide libraries - 15 mers overlapping by 11 amino acids) spanning the entire  
21 protein sequences of adenovirus (hexon and penton), varicella zoster virus (VZV) (IE61, IE62,  
22 IE63, and ORF10) were purchased from JPT technologies (Berlin, Germany). Lyophilized

23 pepmixes were reconstituted at 200 micrograms/ml in DMSO (Sigma-Aldrich, St Louis, MO)  
24 and stored at -80°C.

25

#### 26 **Addition of CD45RA+ T-cell subsets to RAD-PBMC**

27 In experiments in which isolated T<sub>EMRAS</sub>, T<sub>SCMs</sub>, and T<sub>N</sub> subsets were added back to RAD-  
28 EBVSTs, we first isolated CD14 expressing monocytes from PBMCs for use as antigen-  
29 presenting cells before further sorting of the RA+ subsets. CD14+ monocytes were added back to  
30 all cultures at a frequency of 20% to ensure an equal number of antigen-presenting cells in each  
31 group. When T<sub>EMRAS</sub>, T<sub>SCMs</sub>, and T<sub>NAIVE</sub> subsets were added to RAD-PBMCs, the same number of  
32 each was added. Since T<sub>EMRAS</sub> and T<sub>SCMs</sub> have the lowest frequency in PBMCs, the number of  
33 cells sorted in those subsets determined the number of T<sub>EMRAS</sub>, T<sub>SCMs</sub>, and T<sub>NAIVE</sub> cells used for  
34 each donor. To account for artifacts induced by cell sorting in these experiments, we generated  
35 W- and RA+ PBMCs by reconstituting the relevant separated subsets and found they expanded  
36 similarly to EBVSTs generated from standard W- and RA+ PBMCs (fig. S5). After sorting and  
37 recombination, PBMC subsets were combined with CD14+ monocytes and stimulated with EBV  
38 pepmixes. Expansion and specificity were analyzed as before.

39

40 **VST generation:** T-cells specific for adenovirus (AdV), varicella zoster virus (VZV) specific  
41 VSTs were generated in the same way as EBVSTs with pepmix cocktails containing a mastermix  
42 of pepmixes relevant for each virus (hexon and penton of adenovirus, and ORF10, IE61, IE62,  
43 IE63 of VZV) in the presence of IL-15 (at the indicated concentration) (R&D Systems,  
44 Minneapolis, MN) and IL-7 (10ng/ml) (PeproTech, Rocky Hill, NJ). The cells were split, and  
45 VST medium supplemented with cytokines was replenished as required. On day 9, the cells

46 received a second stimulation (S2) - with irradiated T2 pepmix-pulsed autologous ATCs and  
47 irradiated K562cs, at a responder T cell: pepmix-pulsed irradiated autologous ATCs: K562cs  
48 ratio of 1:1:5 in the presence of IL-7 and IL-15. In some instances, ULCLs were used as co-  
49 stimulatory cells instead of K562cs. The cells were then expanded for 7 to 9 days in cytokines  
50 and used for functional characterization.

51

### 52 **Enzyme-linked immunospot (ELISpot) assay**

53 The frequency of T2 antigen-specific T cells within EBVST populations was measured in IFN $\gamma$   
54 ELISpot assays. A 96-well MultiScreen HTS IP plate (EMD Millipore, Burlington, MA) was  
55 coated with anti-human IFN $\gamma$  mAb 1-D1K (Mabtech, Cincinnati, OH) and incubated overnight at  
56 4°C. EBVSTs were plated at  $1 \times 10^5$  per well in duplicate and stimulated with pepmixes, as  
57 indicated in each experiment. T-cells cultured in EBVST medium were used as negative  
58 controls. After 16-24 hours of incubation at 37°C with 5% CO $_2$ , the plate was washed and  
59 incubated with anti-human IFN $\gamma$  mAb 7-B6-1- Biotin (Mabtech, Cincinnati, OH) for 2 hours –  
60 48 hours at 37°C. The plate was washed again and Avidin-peroxidase-complex (Vector  
61 Laboratories, Burlingame, CA) was added for 1 hour at room temperature. The plates were then  
62 developed with 3-amino-9-ethylcarbazole (AEC) (Sigma, St. Louis, MO) substrate, dried  
63 overnight, and sent to Zellnet Consulting (Fort Lee, NJ) for quantification or analyzed in the lab  
64 using Mabtech IRIS – ELISpot reader (Mabtech, Cincinnati, OH). The spot-forming cells  
65 (SFCs)/ $10^5$  cells were used as a measure of the number of cells releasing IFN $\gamma$  in response to  
66 viral antigen pepmixes after subtracting negative control values.

67

### 68 **Intracellular staining (ICS):**

69 VSTs (200  $\mu$ L) were aliquoted into 96-well plates at  $2 \times 10^6$  cells/ml and stimulated with 100ng  
70 of EBV pepmix (EBNA-1, LMP-1, LMP-2) or control pepmix (tumor antigen PRAME) in the  
71 presence of anti-human CD28 and anti-human CD49d (1 $\mu$ g/ml) (BD Biosciences, Franklin  
72 Lakes, NJ) at 37°C for an hour after which brefeldin A and monensin were added. The cells were  
73 then incubated overnight (16-hrs), then washed with PBS, and surface stained with CD3, CD4,  
74 and CD8 antibodies. After 15 mins, cells were washed and stained with fixable live dead stain –  
75 eBioscience Fixable Viability Dye efluor 780 (Thermofisher, Waltham, MA) for 20 mins at 4°C  
76 in the dark. After washing twice with PBS, cells were fixed and permeabilized with  
77 Cytotfix/Cytoperm solution (BD Biosciences, Franklin Lakes, NJ, Franklin Lakes, NJ) for 20  
78 mins at 4°C in the dark. Cells were then washed twice with permeabilizing buffer (perm buffer)  
79 and incubated with IFN- $\gamma$  and TNF- $\alpha$  antibodies (Becton Dickinson,) for 30 mins at 4°C in the  
80 dark. Cells were then washed twice and resuspended in permeabilizing buffer (Thermofisher,  
81 Waltham, MA) for flow cytometry. The cells were acquired using the Gallios Flow Cytometer or  
82 the BD FACSCanto II and results were analyzed using Kaluza software (Beckman Coulter, Inc)  
83 or FlowJo analysis software (FlowJo, LLC, Ashland, OR).

84

#### 85 **Cytotoxicity assay**

86 The cytolytic specificity of the VSTs was evaluated in a standard 4-hour  $^{51}$ Cr chromium release  
87 assay. Autologous ATCs alone or pulsed with pepmixes were used as target cells by labeling  
88 with  $^{51}$ Cr sodium chromate for one hour at 37°C. The target cells were washed thrice, re-  
89 suspended in VST medium, and used as target cells at an effector : target (E:T) ratios of 40:1,  
90 20:1, 10:1, and 5:1. Target cells were cultured in VST medium or 1% Triton X-100 (Sigma-  
91 Aldrich, St. Louis, MO) to achieve spontaneous and maximum release respectively. After 4

92 hours of co-culture, the supernatant was harvested and <sup>51</sup>chromium release was measured using a  
93 gamma counter. The percent specific lysis was calculated from the mean of triplicates as  
94 [(experimental release – spontaneous release) / (maximum release – spontaneous release)] × 100.

95

96

97

#### 98 **SUPPLEMENTARY FIGURE LEGENDS:**

##### 99 **Supplemental figure 1**

##### 100 **The efficiency of CD45RA depletion of PBMCs**

101 CD45RA expressing cells were depleted from the whole (W)-PBMCs of 14 healthy donors to  
102 produce W-, CD45RA depleted (RAD)- and CD45RA+ PBMCs subsets and analyzed by flow  
103 cytometry (A) Dot plot analysis showing CD45RA positive cells in W- and RAD-PBMCs in one  
104 representative donor. (B) Frequency of CD45RA+ cells in W- and RAD-PBMCs from all 14  
105 donors (mean ± SEM). (C) Representative dot plot showing CD3-, CD56+ NK-cells in W- and  
106 RAD-PBMCs. (D) Graphical representation of the frequency of CD3- CD56+ NK cells (D) and  
107 CD4+ CD8- and CD4-CD8+ lymphocytes (E) in W-, RAD- and RA+ PBMCs. A paired two-  
108 tailed Student's *t*-test was used for statistical analyses  $p < .05$ , (.12(ns: non-significant), .033(\*),  
109 .002(\*\*), <.001(\*\*\*)). Data shown are plotted as mean ± SEM.

110

##### 111 **Supplemental figure 2**

##### 112 **Depletion of CD45RA positive PBMCs increases the antigen specificity of derived VSTs.**

113 (A) EBV T2 antigen specificity for W- and RAD-EBVSTs for 16 donors. (B) Frequency of  
114 polyfunctional T2-specific T-cells as measured in ICC assays. The irrelevant peptide is the  
115 human tumor antigen, PRAME. (C) Frequency of CD3+ T-cells and CD3-CD56+ NK cells in  
116 W- and RAD-EBVSTs (n=15). (D) PBMCs specific for adenovirus (hexon and penton), and  
117 VZV (IE2, IE3, and ORF10) were generated from W- and RAD-PBMC as for EBVSTs. Antigen  
118 specificity on day 16 as measured by ELISpot is shown for 7 donors. Statistical significance was  
119 determined using paired two-tailed Student's *t*-test.  $p < .05$ , (.12(ns: non-significant),  
120 .033(\*),.002(\*\*),<.001(\*\*\*) Data shown are plotted as mean  $\pm$  SEM.

121

### 122 **Supplemental figure 3**

#### 123 **Expansion and specificity of EBVSTs generated from W-, RAD-, and CD45RA+ PBMCs**

124 EBVSTs were generated from W-, RAD- and RA+ PBMC subsets, and their proliferation and  
125 antigen specificity were evaluated on day 16. (A) Fold expansion of W-, RAD- and RA+  
126 EBVSTs from day 0 to day 16 (n=5). (B) EBV antigen specificity of W- vs. RAD- (D) and RA+  
127 EBVSTs n=5. Data are plotted as mean  $\pm$  SEM.

128

### 129 **Supplemental figure 4**

#### 130 **Increased clonality of EBVSTs derived from CD45RA depleted PBMCs**

131 TCRV $\beta$  sequencing was performed on W-, RAD-, and RA+ PBMCs and their derived EBVSTs.  
132 (A) Illustration of the generation of W-, RA+ and RAD- subsets for TCRV $\beta$   
133 immunosequencing. (B and C) Venn diagram representation of unique and shared TCR  
134 V $\beta$  sequences observed in W-, RAD- and RA+ PBMCs (B) and their derived EBVSTs (C) for  
135 donor 2.  $N_c$  indicates the total number functional TCR templates. (D) Circos plots showing the

136 50 largest clonotypes in W- (top) and RAD (bottom) PBMCs and their derived EBVSTs for  
137 donor 2. Ribbons indicate shared clonotypes (W-PBMCs (grey) , W-EBVSTs (blue), RAD-  
138 PBMCs (grey) and RAD-EBVSTs (green). (E) Circos plot comparing the top 50 clonotypes of  
139 W- (blue) and RA+ (purple) EBVSTs from donors 1 (left) and donor 2 (right) (F) Productive  
140 Simpson's clonality of W-, RAD- and RA+ PBMC (black) and derived EBVST (red) TCR  
141 repertoires. 0 indicates the most diverse possible repertoire (clonotypes size of 1), and 1  
142 represents a monoclonal sample.

143

#### 144 **Supplemental Table 1**

145 Frequency of top 50 clones in W-, RAD-, and RA+ PBMCs and their subsequent derived  
146 EBVSTs

147

#### 148 **Supplemental figure 5**

149 **Top clonotypes in RAD-EBVSTs show a greater relative change in the frequency from**  
150 **PBMC compared to EBVSTs from W- or RA+ subsets**

151 Violin plots show the relative change in frequency (over the 16 days of culture) of the top 10  
152 ranked EBVST clonotypes in each other EBVST subset. For example, 5Aa compares the change  
153 in frequency of the top ten RAD-EBVST clonotypes in the RAD-EBVST subset with the change  
154 in frequency of the same clonotypes in the W- and RA+ EBVST subsets. The relative change  
155 was calculated by dividing the frequencies of the top EBVST clonotypes by their frequencies in  
156 PBMCs . (A) Donor 1 a-c, (B) Donor 2 d-f. Above the black dotted line are clonotypes whose  
157 frequency increased, below the dotted line the frequencies decreased. However, this does not  
158 take into account the fold expansion of each clonotype (shown in Figure 3f). Each clonotype is

159 represented by a solid circle, and lines connect the same clonotypes in other subsets. Black  
160 circles indicate clonotypes that were also detected in the PBMC of each subset. Red clonotypes  
161 were not present in the EBVST subset. Blue clonotypes were detected in the EBVST subset but  
162 not in the parental PBMC, in which case, the change in frequency was based on the assumption  
163 that the clonotype was of size 1 cell in the parental PBMC

164

### 165 **Supplemental figure 6**

#### 166 **The effects of various subsets on the antigen specificity of RAD-EBVSTs**

167 To isolate subsets, NK-cells and T-regs were isolated from W-PBMCs as described in the  
168 methods section. T<sub>EMRAs</sub> (CD45RA+, CCR7-), T<sub>SCMs</sub> (CD45RA+, CCR7+, CD95+) and T<sub>N</sub>  
169 (CD45RA+, CCR7+, CD95-) from EBV seropositive healthy donor were isolated using  
170 fluorescence-activated cell sorting (FACS). EBVSTs were generated from the PBMC subsets  
171 indicated and their antigen specificity was measured in ELIspot assays on day 16. (A) Bar graph  
172 compares the antigen specificity of EBVSTs derived from Whole (W)-, RAD, NK-depleted  
173 (NKD)- and natural Treg-depleted (TRD-) PBMCs from 5 PBMC donors. (B and C) CD45RA+  
174 PBMCs were sorted into T<sub>SCM</sub>, (T<sub>S</sub>), T<sub>NAIVE</sub> (T<sub>N</sub>) and T<sub>EMRA</sub> (T<sub>E</sub>) subsets and stimulated alone or  
175 in combination using pepmix-pulsed, CD14+ PBMCs (n=6 from buffy coats). The RA+ subset  
176 was reconstituted from T<sub>SCM</sub>, T<sub>N</sub>, and T<sub>EMRA</sub> subsets. The reconstituted CD45RA+ subset was  
177 added to RAD-PBMCs to generate W-PBMCs. (B) Fold expansion of each subset alone and in  
178 combination. (C) Antigen specificity on day 16. Data are plotted as mean ± SEM.

179

### 180 **Supplemental figure 7**

#### 181 **Lower expression of exhaustion markers on RAD-EBVSTs**

182 The surface expression levels of T-cell exhaustion markers were evaluated in W- and RAD-  
183 EBVSTs on day 16. (A) Histogram plots show the mean fluorescence intensity (MFI) of TIM-3  
184 and LAG-3 in W- and RAD-EBVSTs from 2 representatives of 6 EBV seropositive donor  
185 EBVSTs. (B) Dot plot representing the TIM3+ and LAG-3+ T-cells and (C) Frequency of  
186 KLRG1+ TIM3+ LAG-3+ CD3+ cells in W- and RAD-EBVSTs (n=6). Statistical significance  
187 was determined by paired two-tailed Student's *t*-test.  $p < 0.05$ , (.12(ns: non-significant),  
188 .033(\*),.002(\*\*) ,<.001(\*\*\*) Data shown are plotted as mean  $\pm$  SEM.
