# Supplementary figures and images for: Naive T cells inhibit the outgrowth of intractable antigen-activated memory T cells: implications for T-cell immunotherapy
Source: HighWire-hosted journal article supplement (doi:10.1136/jitc-2022-006267), 2023-04-01

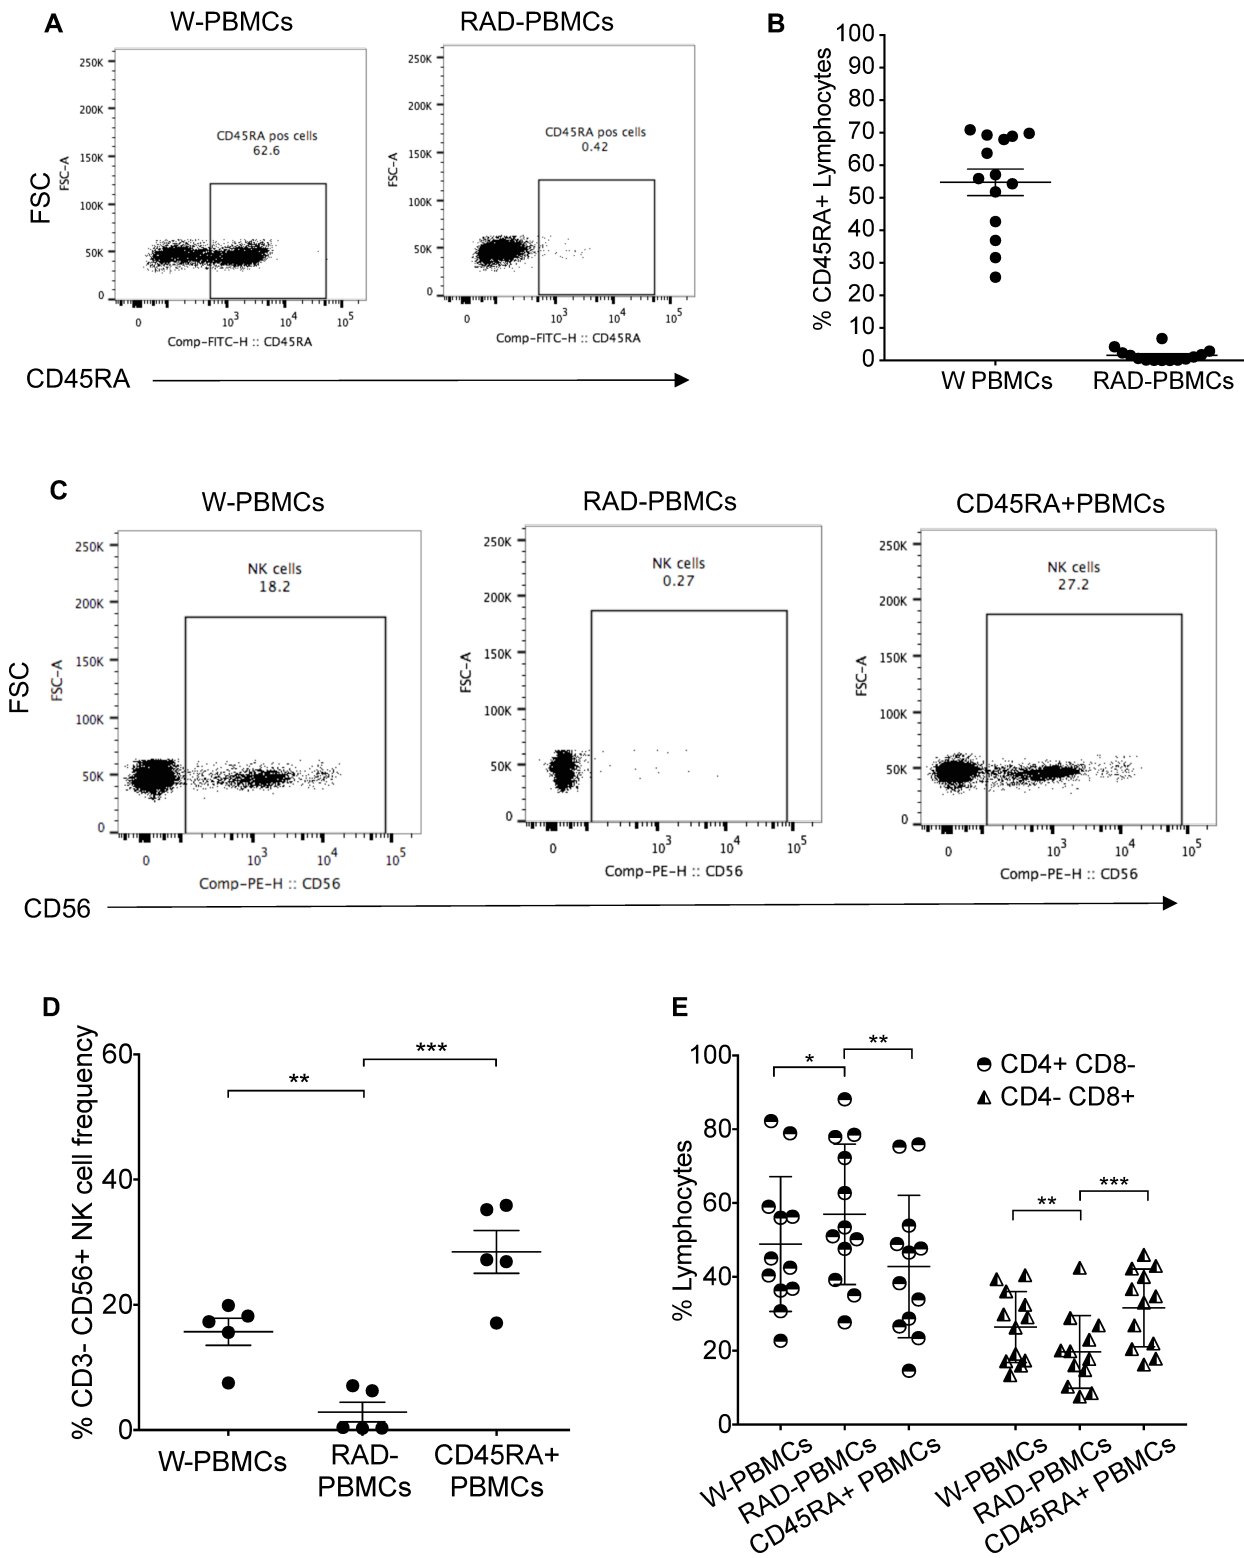

Supplement: jitc-2022-006267supp001_data_supplement.pdf [file jitc-2022-006267supp001_data_supplement.pdf]

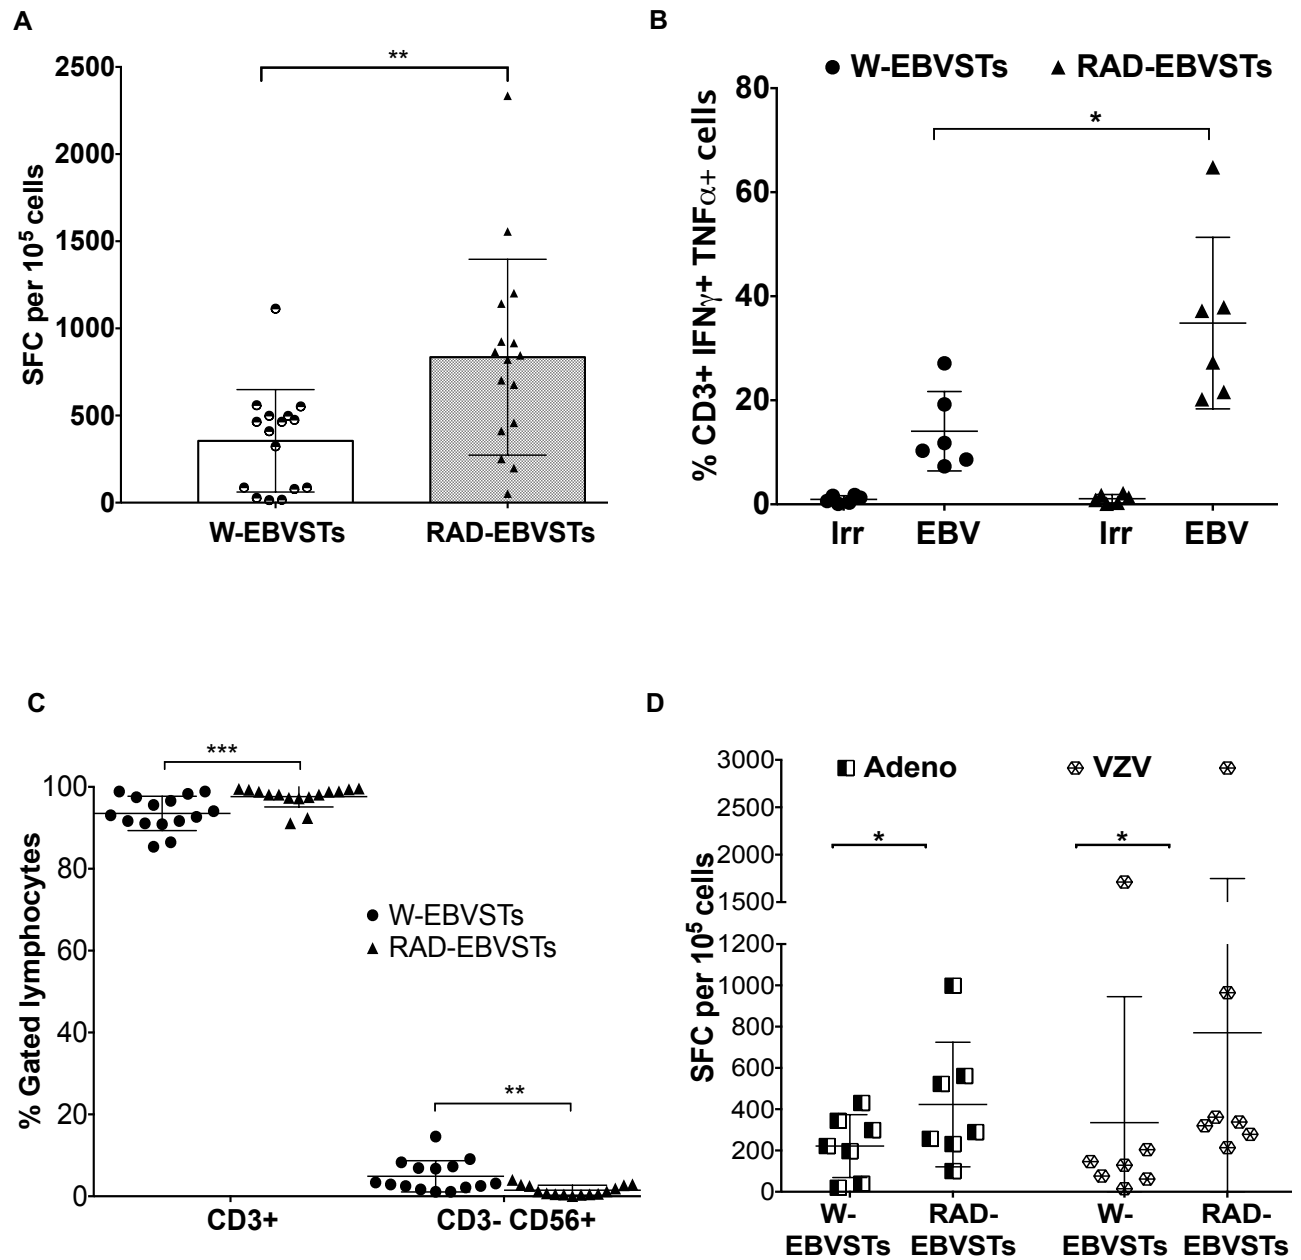

Supplement: jitc-2022-006267supp002_data_supplement.pdf [file jitc-2022-006267supp002_data_supplement.pdf]

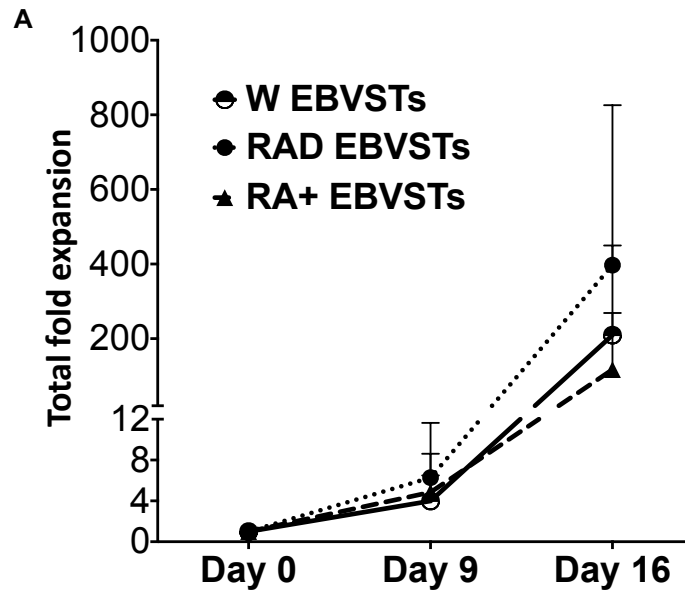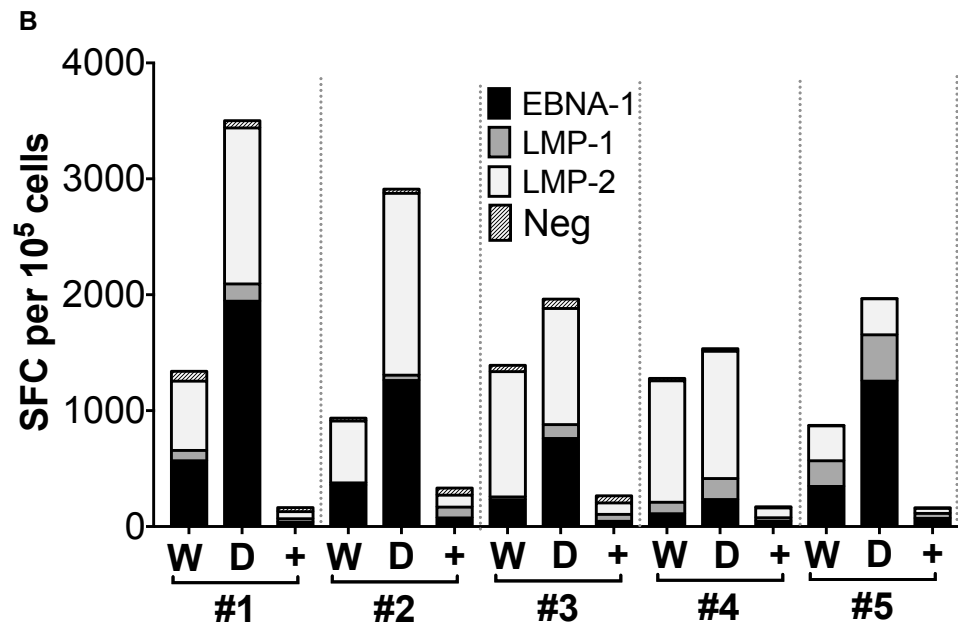

Supplement: jitc-2022-006267supp003_data_supplement.pdf [file jitc-2022-006267supp003_data_supplement.pdf]

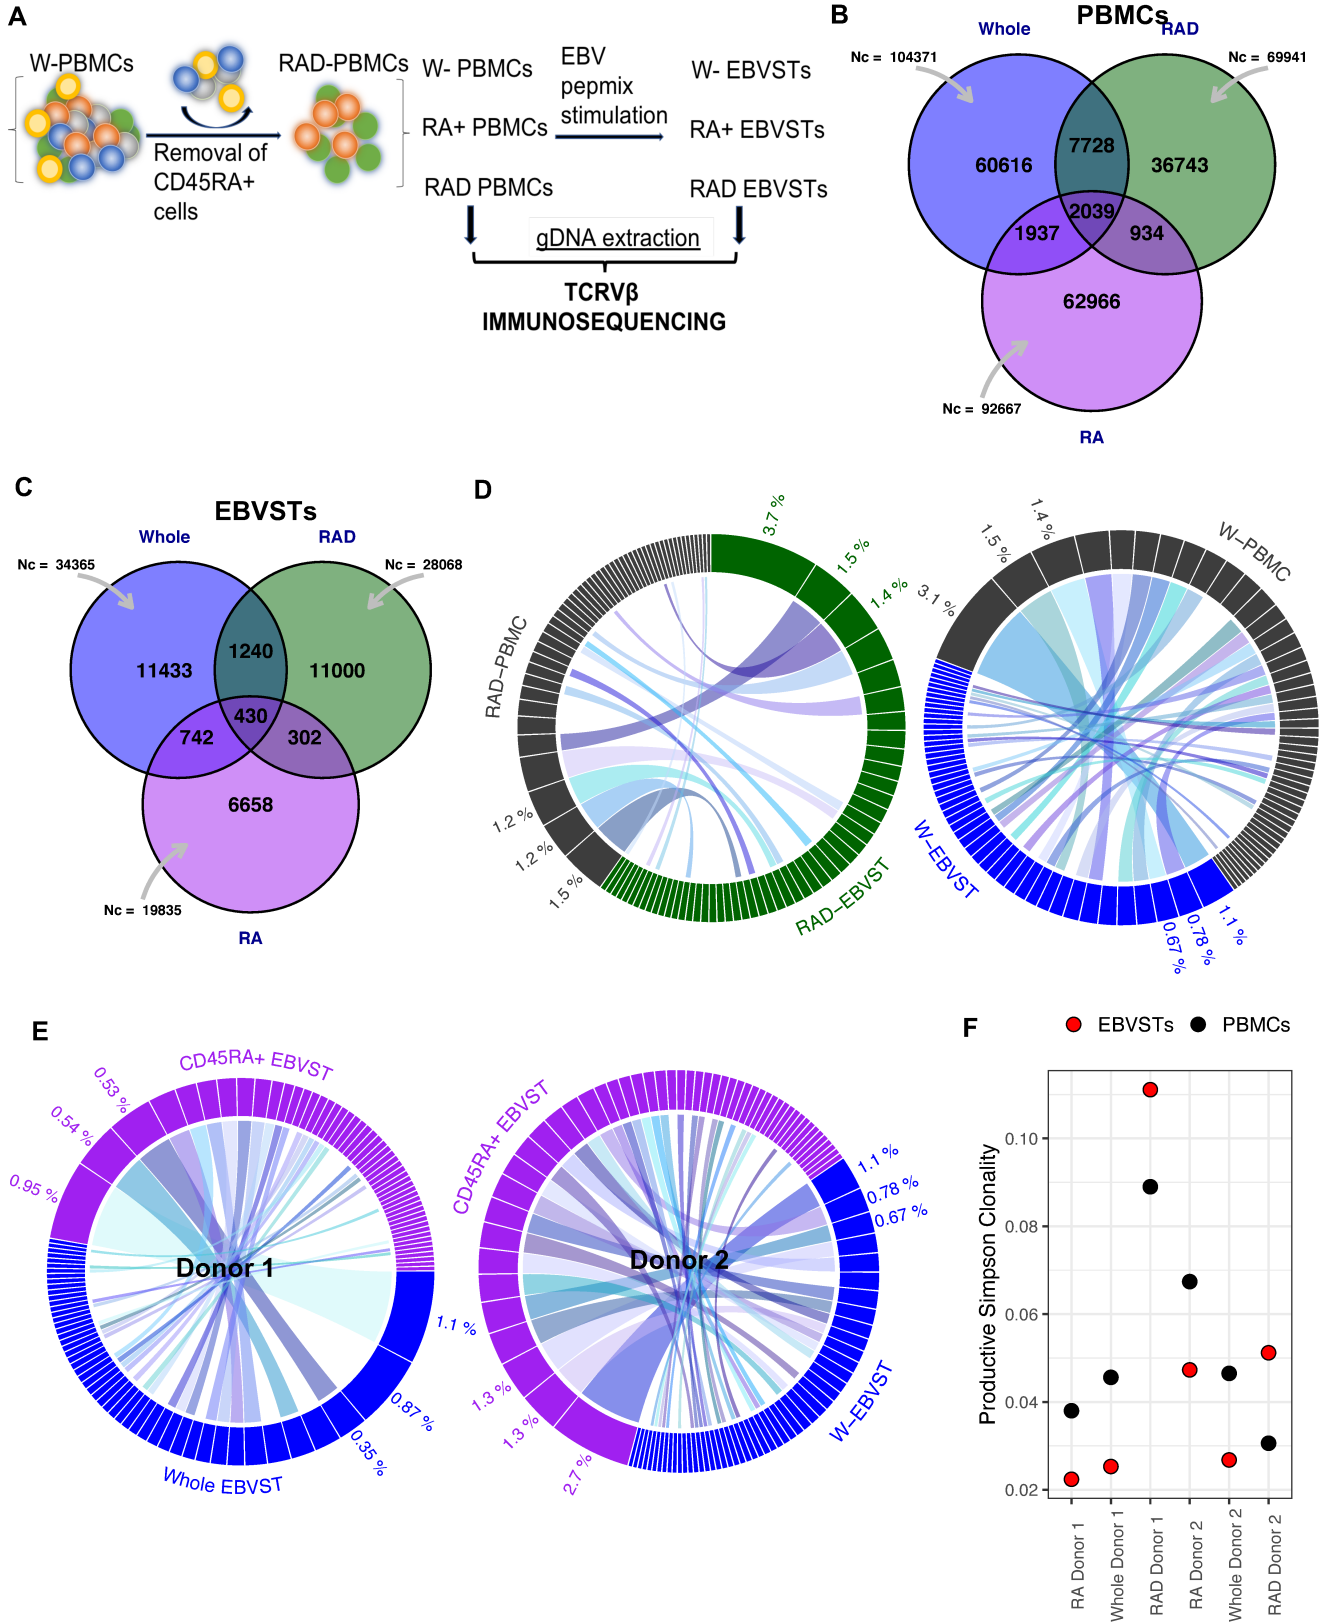

Supplement: jitc-2022-006267supp004_data_supplement.pdf [file jitc-2022-006267supp004_data_supplement.pdf]

A

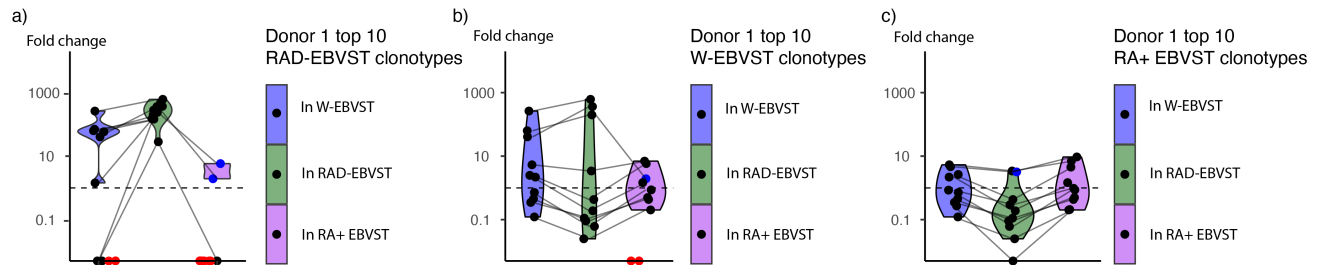

B

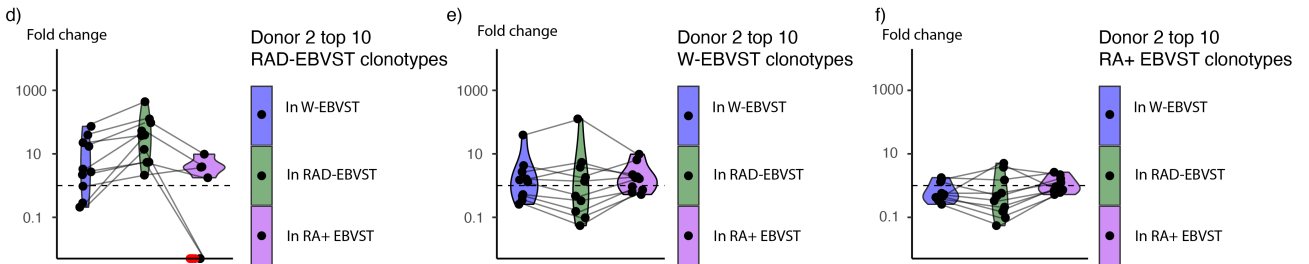

Supplement: jitc-2022-006267supp005_data_supplement.pdf [file jitc-2022-006267supp005_data_supplement.pdf]

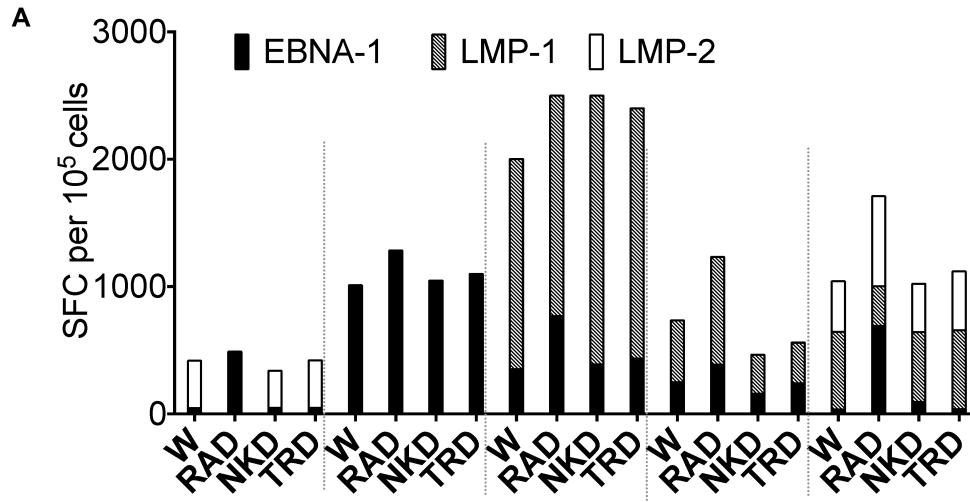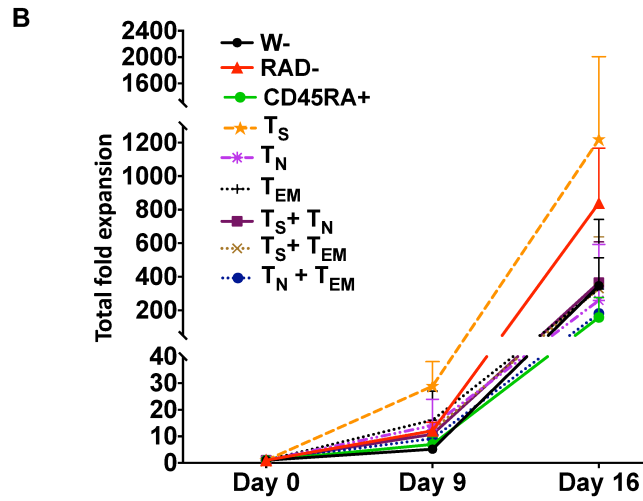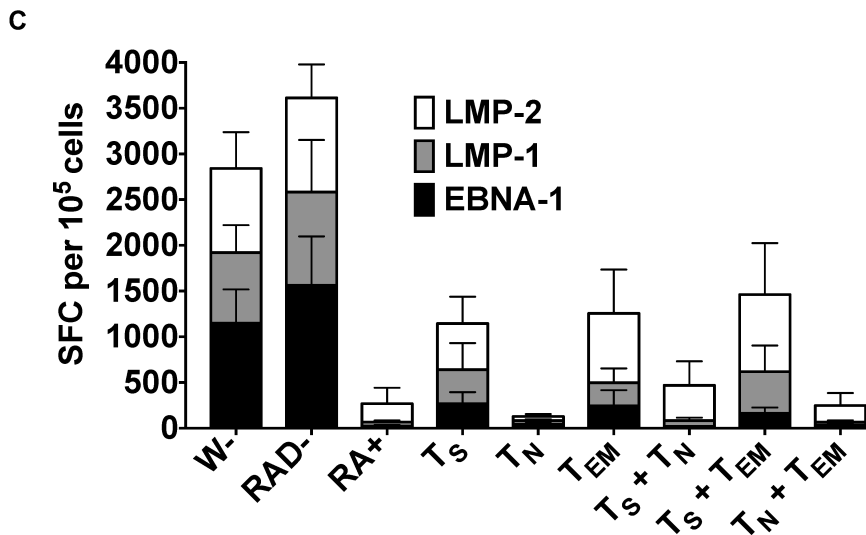

Supplement: jitc-2022-006267supp006_data_supplement.pdf [file jitc-2022-006267supp006_data_supplement.pdf]

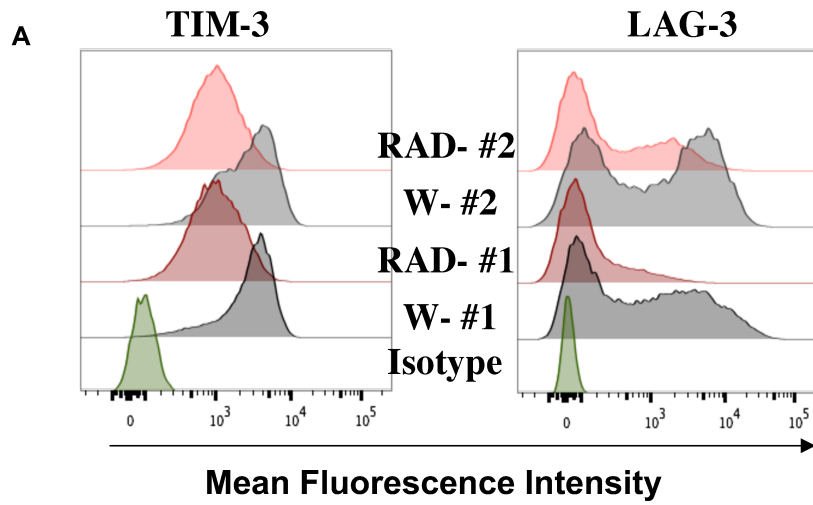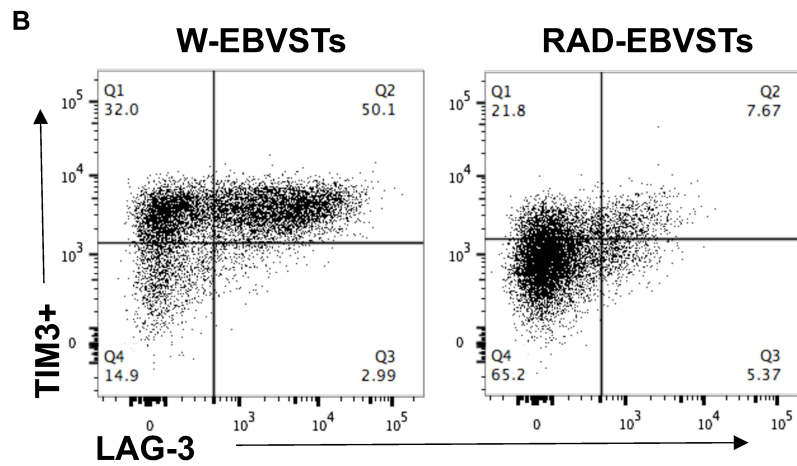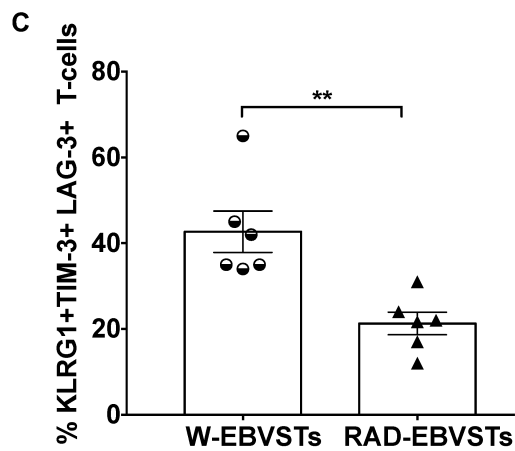

Supplement: jitc-2022-006267supp007_data_supplement.pdf [file jitc-2022-006267supp007_data_supplement.pdf]
